# Supplementary material for: Adherence of Malaysian Adults’ Energy and Macronutrient Intakes to National Recommendations: A Review and Meta-Analysis
Source: PubMed Central journal article supplement (PMC6266340; doi:10.3390/nu10111584), 2018-10-28
Supplement: nutrients-10-01584-s001.pdf [file nutrients-10-01584-s001.pdf]

## Supplementary Materials

**Table S1.** Pubmed search terms and search strategy.

| Search terms               | Search strategy                                                                                                                                                                                                                                                                                                                       | No. of studies | No. selected |
|----------------------------|---------------------------------------------------------------------------------------------------------------------------------------------------------------------------------------------------------------------------------------------------------------------------------------------------------------------------------------|----------------|--------------|
| Diet, food, Malaysia       | ((“diet”[MeSH Terms] OR “diet”[All Fields]) AND (“food”[MeSH Terms] OR “food”[All Fields])) AND (“malaysia”[MeSH Terms] OR “malaysia”[All Fields]) AND (“2007/06/26”[PDat] : “2017/06/22”[PDat] AND “humans”[MeSH Terms])                                                                                                             | 234            | 6            |
| Fat, Malaysia              | (fat[All Fields] AND (“malaysia”[MeSH Terms] OR “malaysia”[All Fields])) AND “humans”[MeSH Terms]                                                                                                                                                                                                                                     | 183            | 6            |
| Protein, food, Malaysia    | ((“proteins”[MeSH Terms] OR “proteins”[All Fields] OR “protein”[All Fields]) AND (“food”[MeSH Terms] OR “food”[All Fields])) AND (“malaysia”[MeSH Terms] OR “malaysia”[All Fields]) AND (“2007/07/07”[PDat] : “2017/07/03”[PDat] AND “humans”[MeSH Terms])                                                                            | 283            | 0            |
| Nutrition survey, Malaysia | ((“nutrition surveys”[MeSH Terms] OR (“nutrition”[All Fields] AND “surveys”[All Fields]) OR “nutrition surveys”[All Fields] OR (“nutrition”[All Fields] AND “survey”[All Fields]) OR “nutrition survey”[All Fields]) AND (“malaysia”[MeSH Terms] OR “malaysia”[All Fields])) AND (“2007/07/15”[PDat] : “2017/07/11”[PDat])            | 181            | 8            |
| Food consumption, Malaysia | ((“food”[MeSH Terms] OR “food”[All Fields]) AND (“economics”[MeSH Terms] OR “economics”[All Fields] OR “consumption”[All Fields]) AND (“malaysia”[MeSH Terms] OR “malaysia”[All Fields])) AND (“2007/07/15”[PDat] : “2017/07/11”[PDat] AND “humans”[MeSH Terms])                                                                      | 192            | 1            |
| Nutrient intake, Malaysia  | ((“energy intake”[MeSH Terms] OR (“energy”[All Fields] AND “intake”[All Fields]) OR “energy intake”[All Fields] OR (“nutrient”[All Fields] AND “intake”[All Fields]) OR “nutrient intake”[All Fields]) AND (“malaysia”[MeSH Terms] OR “malaysia”[All Fields])) AND (“2007/07/15”[PDat] : “2017/07/11”[PDat] AND “humans”[MeSH Terms]) | 105            | 1            |
| Carbohydrates, Malaysia    | (carbohydrate OR monosaccharide OR disaccharide OR polysaccharide), malaysia                                                                                                                                                                                                                                                          | 766            | 7            |
| Total                      |                                                                                                                                                                                                                                                                                                                                       | 1944           | 21           |
| FAO food balance sheet     |                                                                                                                                                                                                                                                                                                                                       |                | 1            |
| Overall total              |                                                                                                                                                                                                                                                                                                                                       |                | 22           |

Table S2. Findings on energy intake of Malaysian adults

| Source (y)                       | Sample                               | Method                                | Results                                                                                                                                                                                                                                                            |
|----------------------------------|--------------------------------------|---------------------------------------|--------------------------------------------------------------------------------------------------------------------------------------------------------------------------------------------------------------------------------------------------------------------|
| FAO food balance sheet (2013)[5] | n/a                                  | Calculated from available food supply | Available total energy supply = 2916 kcal/capita/day<br>Average dietary energy supply adequacy (3-yr average)<br>- 2014-2016 = 127%<br>- 2012-2014 = 124%                                                                                                          |
| <i>Nationwide studies</i>        |                                      |                                       |                                                                                                                                                                                                                                                                    |
| Mahmud et al. (2015)[6]          | MANS 2014 sample                     | Single 24-hr recall                   | Prevalence of Malaysian adults that met the RNI for energy = 23% (95% CI 20.9, 25.2)<br>- Males = 20.1% (95% CI 17.3, 23.3)<br>- Females = 26.1% (95% CI 23.5, 28.9)<br>10.6% of adults had intakes exceeding the RNI<br>66.5% of adults had intakes below the RNI |
| MANS 2014 (2014)[16]             | 2973 individuals aged 18 to 59 years | Single 24-hr recall                   | Demographic characteristic                                                                                                                                                                                                                                         |
|                                  |                                      |                                       | Energy intake/day (% RNI of median)                                                                                                                                                                                                                                |
|                                  |                                      |                                       | Both sexes    Men    Women                                                                                                                                                                                                                                         |
|                                  |                                      |                                       | Malaysia                                                                                                                                                                                                                                                           |
|                                  |                                      |                                       | 64.4    66.5    62.1                                                                                                                                                                                                                                               |
|                                  |                                      |                                       | Zone                                                                                                                                                                                                                                                               |
|                                  |                                      |                                       | - Peninsular                                                                                                                                                                                                                                                       |
|                                  |                                      |                                       | 63.3    66.7    60.4                                                                                                                                                                                                                                               |
|                                  |                                      |                                       | Malaysia                                                                                                                                                                                                                                                           |
|                                  |                                      |                                       | - East Malaysia                                                                                                                                                                                                                                                    |
|                                  |                                      |                                       | 65.7    66.4    65.5                                                                                                                                                                                                                                               |
|                                  |                                      |                                       | Strata                                                                                                                                                                                                                                                             |
|                                  |                                      |                                       | - Urban                                                                                                                                                                                                                                                            |
|                                  |                                      |                                       | 65.8    69.6    62.6                                                                                                                                                                                                                                               |
|                                  |                                      |                                       | - Rural                                                                                                                                                                                                                                                            |
|                                  |                                      |                                       | 62.1    63.4    61.4                                                                                                                                                                                                                                               |
|                                  |                                      |                                       | Age group (years)                                                                                                                                                                                                                                                  |
|                                  |                                      |                                       | - 18-19                                                                                                                                                                                                                                                            |
|                                  |                                      |                                       | 65.5    62.6    71.3                                                                                                                                                                                                                                               |
|                                  |                                      |                                       | - 20-29                                                                                                                                                                                                                                                            |
|                                  |                                      |                                       | 68.9    67.4    70.8                                                                                                                                                                                                                                               |
|                                  |                                      |                                       | - 30-39                                                                                                                                                                                                                                                            |
|                                  |                                      |                                       | 65.0    70.2    61.1                                                                                                                                                                                                                                               |
|                                  |                                      |                                       | - 40-49                                                                                                                                                                                                                                                            |
|                                  |                                      |                                       | 63.7    66.6    59.5                                                                                                                                                                                                                                               |
|                                  |                                      |                                       | - 50-59                                                                                                                                                                                                                                                            |
|                                  |                                      |                                       | 59.4    61.3    58.7                                                                                                                                                                                                                                               |
|                                  |                                      |                                       | Ethnicity                                                                                                                                                                                                                                                          |
|                                  |                                      |                                       | - Malay                                                                                                                                                                                                                                                            |
|                                  |                                      |                                       | 2864.7    67.4    62.0                                                                                                                                                                                                                                             |
|                                  |                                      |                                       | - Chinese                                                                                                                                                                                                                                                          |
|                                  |                                      |                                       | 66.8    69.6    64.4                                                                                                                                                                                                                                               |
|                                  |                                      |                                       | - Indian                                                                                                                                                                                                                                                           |
|                                  |                                      |                                       | 58.3    66.5    52.8                                                                                                                                                                                                                                               |

|                   |      |      |      |
|-------------------|------|------|------|
| - Bumiputera      | 62.7 | 63.1 | 62.3 |
| Sabah             |      |      |      |
| - Bumiputera      | 63.8 | 62.1 | 65.5 |
| Sarawak           |      |      |      |
| - Others          | 64.1 | 67.0 | 61.4 |
| - Other Bumis     | 55.6 | 55.5 | 55.6 |
| Marital status    |      |      |      |
| - Never married   | 65.2 | 64.5 | 65.9 |
| - Married/cohabit | 64.5 | 67.4 | 61.8 |
| ing               |      |      |      |
| - Divorced/separa | 60.4 | 64.4 | 59.2 |
| ting              |      |      |      |
| - Widow           | 56.0 | -    | 55.9 |
| Educational level |      |      |      |
| - Non-formal      | 51.9 | 51.8 | 52.8 |
| - Primary         | 60.7 | 64.4 | 58.4 |
| - Secondary       | 64.0 | 65.8 | 62.0 |
| - Tertiary        | 68.3 | 69.9 | 66.0 |
| - Others          | 70.9 | 62.8 | 74.1 |
| Work status       |      |      |      |
| - Government/se   | 66.6 | 71.1 | 63.1 |
| mi-government     |      |      |      |
| - Private         | 64.8 | 67.2 | 62.0 |
| - Self-employed   | 64.2 | 66.5 | 59.9 |
| - Unpaid workers  | 90.0 | 95.8 | 90.0 |
| - Not working     | 61.1 | 55.4 | 61.8 |
| - Retired         | 62.7 | 58.7 | 69.8 |
| - students        | 67.0 | 63.3 | 67.7 |
| Income group      |      |      |      |
| - less than       | 61.1 | 63.2 | 60.2 |
| RM1500            |      |      |      |
| - RM1500-         | 66.0 | 69.2 | 64.7 |
| RM3500            |      |      |      |
| - More than       | 67.3 | 70.4 | 63.3 |
| RM3500            |      |      |      |

|             |             |          |               |               |           |
|-------------|-------------|----------|---------------|---------------|-----------|
| Asma        | 3063        | 126-item | Age group (y) | Energy intake | Energy as |
| (2014)      | individuals | FFQ      |               | Mean ± SD     | mean %    |
| analysis of | aged 18 to  |          | Men           | (kcal/day)    | RNI       |
| MANS 2003   | 59 y        |          |               |               |           |
| data[7]     |             |          |               |               |           |
|             |             |          | - 18-29       | 2463 ± 18.0   | ---       |

|                            |                             |                     |               |                    |                                          |                            |
|----------------------------|-----------------------------|---------------------|---------------|--------------------|------------------------------------------|----------------------------|
|                            |                             |                     | -             | 30-50              | 2491 ± 14.1                              | ---                        |
|                            |                             |                     | -             | 51-60              | 2408 ± 33.6                              | ---                        |
|                            |                             |                     | -             | Total for all ages | 2472 ± 10.6                              | 101                        |
|                            |                             |                     | Women         |                    |                                          |                            |
|                            |                             |                     | -             | 18-29              | 2083 ± 14.9                              | ---                        |
|                            |                             |                     | -             | 30-50              | 2159 ± 13.3                              | ---                        |
|                            |                             |                     | -             | 51-60              | 2112 ± 28.1                              | ---                        |
|                            |                             |                     | -             | Total for all ages | 2125 ± 9.4                               | 100.8                      |
|                            |                             |                     | -             |                    |                                          |                            |
| Mirnalini et al. (2008)[8] | 6886 adults aged 18 to 59 y | Single 24-hr recall | Age group (y) |                    | Energy intake<br>Mean ± SE<br>(kcal/day) | Energy as<br>mean %<br>RNI |
|                            |                             |                     | Men           |                    |                                          |                            |
|                            |                             |                     | -             | 18-19              | 1817 ± 82                                | 74.5                       |
|                            |                             |                     | -             | 20-29              | 1805 ± 23                                | 74.0                       |
|                            |                             |                     | -             | 30-39              | 1847 ± 24                                | 75.1                       |
|                            |                             |                     | -             | 40-49              | 1716 ± 23                                | 69.8                       |
|                            |                             |                     | -             | 50-59              | 1638 ± 30                                | 66.6                       |
|                            |                             |                     | Women         |                    |                                          |                            |
|                            |                             |                     | -             | 18-19              | 1419 ± 55                                | 71.0                       |
|                            |                             |                     | -             | 20-29              | 1519 ± 22                                | 76.0                       |
|                            |                             |                     | -             | 30-39              | 1468 ± 18                                | 67.3                       |
|                            |                             |                     | -             | 40-49              | 1387 ± 21                                | 63.6                       |
|                            |                             |                     | -             | 50-59              | 1360 ± 28                                | 62.4                       |
|                            |                             |                     | All           |                    |                                          |                            |
|                            |                             |                     | -             | 18-19              | 1621 ± 51                                | ---                        |
|                            |                             |                     | -             | 20-29              | 1665 ± 16                                | ---                        |
|                            |                             |                     | -             | 30-39              | 1660 ± 16                                | ---                        |
|                            |                             |                     | -             | 40-49              | 1555 ± 16                                | ---                        |
|                            |                             |                     | -             | 50-59              | 1503 ± 21                                | ---                        |

*Small studies*

| Author (y)                | Sample                          | Method                                     | Results         |                                |                 |
|---------------------------|---------------------------------|--------------------------------------------|-----------------|--------------------------------|-----------------|
|                           |                                 |                                            | <i>All ages</i> |                                |                 |
| Karupiah et al. (2013)[9] | 128 urban women aged 19 to 65 y | 3-day diet records (2 weekdays, 1 weekend) | Age group (y)   | Mean energy intake (kcal) ± SD | Energy as % RNI |
|                           |                                 |                                            | 19 to 29        | 1867 ± 175                     | 93              |
|                           |                                 |                                            | 30 to 50        | 1838 ± 229                     | 84              |

|                                |                                                       |                     | 51 to 59        | 1706 ± 109                       | 78                      |                  |               |
|--------------------------------|-------------------------------------------------------|---------------------|-----------------|----------------------------------|-------------------------|------------------|---------------|
| <i>Young adults</i>            |                                                       |                     |                 |                                  |                         |                  |               |
| Abdull Hakim et al. (2012)[10] | 200 students aged 18 to 24 y (45% males, 55% females) | Single 24-hr recall | Subjects        | Energy intake (kcal) ± SD        | < RNI No. (%)           | Meet RNI No. (%) | > RNI No. (%) |
|                                |                                                       |                     | Males - 18 y    | 1923.09 ± 477.62 (67.7% RNI)     | ---                     | ---              | ---           |
|                                |                                                       |                     | - 19+ y         | 1948.25 ± 440.07 (79.8% RNI)     | ---                     | ---              | ---           |
|                                |                                                       |                     | Total (n=90)    | 1938.47 ± 452.55                 | 82 (90.9)               | ---              | 8 (9.1)       |
|                                |                                                       |                     | Females - 18 y  | 1756.84 ± 363.34 (85.7% RNI)     | ---                     | ---              | ---           |
|                                |                                                       |                     | - 19+ y         | 1651.07 ± 388.46 (82.5% RNI)     | ---                     | ---              | ---           |
|                                |                                                       |                     | Total (n=110)   | 1681.84 ± 382.72                 | 79 (72.2)               | ---              | 31 (27.8)     |
| <br>                           |                                                       |                     |                 |                                  |                         |                  |               |
| Gan al. (2011)[11]             | 584 students aged 18 to 24 y (41% males; 59% females) | Two 24-h recalls    | Subjects        | Energy intake (kcal/d) mean ± SD | Energy as % RNI mean±SD | < RNI No. (%)    | ≥ RNI No. (%) |
|                                |                                                       |                     | Males (n=237)   | 2120 ± 614                       | 86.9±25.2               | 173 (73.0)       | 64 (27.0)     |
|                                |                                                       |                     | Females (n=343) | 1624 ± 506                       | 81.2±25.3               | 276 (80.5)       | 67 (19.5)     |

| <i>Older adults</i>        |                                                                                              |                              |                                            |                                  |                                                                |                           |  |
|----------------------------|----------------------------------------------------------------------------------------------|------------------------------|--------------------------------------------|----------------------------------|----------------------------------------------------------------|---------------------------|--|
| Norsham et al. (2015)[14]  | 450 women aged 30 to 65 y                                                                    | Diet history questionnaire   | Subjects                                   | Mean energy intake (kcal/d) ± SD | Meet RNI No. (%)                                               | Does not meet RNI No. (%) |  |
|                            |                                                                                              |                              | Normal                                     | 1414±405                         | 152 (34)                                                       | 140 (31)                  |  |
|                            |                                                                                              |                              | With breast adiposity                      | 1537±386                         | 75 (17)                                                        | 83 (18)                   |  |
|                            |                                                                                              |                              | Total                                      |                                  | 227 (51%)                                                      | 223 (49%)                 |  |
| Yee et al. (2013)[12]      | 73 healthy Chinese premenopausal women aged 30 to 45y from Klang Valley                      | Single 24-hr recall          | Subjects                                   | Mean energy intake (kcal/d) ± SD | RNI value presented for comparison only (no computations done) |                           |  |
|                            |                                                                                              |                              | All subjects 30 to 45 y                    | 1506 ± 427 (range 455-2938)      | RNI = 2180                                                     |                           |  |
| Sulaiman et al. (2011)[13] | 301 women (151 in rural areas, 150 in urban areas) aged 21 to 49 y (mean age 38.05 ± 7.03 y) | Single 24-h recall; MANS FFQ | Subjects according to food security status | Mean energy (kcal) ± SD          | Energy as % RNI (mean ± SD)                                    |                           |  |
|                            |                                                                                              |                              | Rural respondent                           |                                  |                                                                |                           |  |
|                            |                                                                                              |                              | - Food secure                              | 1959 ± 620.08                    | 90.15 ± 28.54                                                  |                           |  |
|                            |                                                                                              |                              | - Moderately insecure                      | 1671 ± 573.18                    | 77.44 ± 26.31                                                  |                           |  |
|                            |                                                                                              |                              | - Severely insecure                        | 1602 ± 624.94                    | 73.67 ± 29.93                                                  |                           |  |
|                            |                                                                                              |                              | Urban respondent                           |                                  |                                                                |                           |  |
|                            |                                                                                              |                              | - Food secure                              | 1407 ± 363.90                    | 64.53 ± 16.69                                                  |                           |  |

|                       |                                                |                  |                |                         |               |                 |
|-----------------------|------------------------------------------------|------------------|----------------|-------------------------|---------------|-----------------|
|                       |                                                |                  |                | - Moderately insecure   | 1278 ± 379.55 | 58.63 ± 17.41   |
|                       |                                                |                  |                | - Severely insecure     | 1177 ± 443.46 | 53.99 ± 20.34   |
| Pon et al. (2006)[15] | 360 urban middle-aged women aged 51.65 ± 5.4 y | Quantitative FFQ | Subjects       | Mean energy (kcal) ± SD |               | Energy as % RDA |
|                       |                                                |                  | Females (all)  | 1615 ± 226              | 88.5          |                 |
|                       |                                                |                  | Premenopausal  | 1633 ± 244              | 87.3          |                 |
|                       |                                                |                  | Postmenopausal | 1591 ± 198              | 90.3          |                 |

--- No data

Table S3. Findings on protein intake of Malaysian adults

| Source (y)                       | Sample | Method                                | Results                                                                                                                                                                                                                                                                                                                                                                                         |
|----------------------------------|--------|---------------------------------------|-------------------------------------------------------------------------------------------------------------------------------------------------------------------------------------------------------------------------------------------------------------------------------------------------------------------------------------------------------------------------------------------------|
| FAO food balance sheet (2013)[5] | n/a    | Calculated from available food supply | <ul style="list-style-type: none"> <li>Protein supply (g/capita/day) = 81.58</li> <li>Protein supply (kcal/capita/day) = 326.32; comprises approximately 11% of available energy/capita/day</li> <li>Average supply of protein of animal origin (3-year average) <ul style="list-style-type: none"> <li>2011-2013 = 44 g/capita/day</li> <li>1991-2001 = 42 g/capita/day</li> </ul> </li> </ul> |

#### Nationwide surveys

Mahmud et al. (2015)[6]

MANS 2014 sample

Single 24-hr recall

Prevalence of Malaysian adults that met the RNI for protein = 40.4% (95% CI 37.9, 43.0)

- Males = 39.4% (95% CI 35.9, 43.0)
- Females = 41.5% (95% CI 38.3, 44.8)

50.7% of adults had intakes exceeding the RNI

8.8% had intakes below the RNI

|                |                                      |                     |                            |                                      |       |       |
|----------------|--------------------------------------|---------------------|----------------------------|--------------------------------------|-------|-------|
| MANS 2014 [16] | 2973 individuals aged 18 to 59 years | Single 24-hr recall | Demographic characteristic | Protein intake/day (% RNI of median) |       |       |
|                |                                      |                     |                            | Both sexes                           | Men   | Women |
|                |                                      |                     | Malaysia                   | 97.7                                 | 101.3 | 94.9  |

|                   |                |       |       |       |
|-------------------|----------------|-------|-------|-------|
| Zone              |                |       |       |       |
| -                 | Peninsular     | 94.8  | 99.2  | 90.2  |
| Malaysia          |                |       |       |       |
| -                 | East Malaysia  | 102.5 | 103.2 | 102.2 |
| Strata            |                |       |       |       |
| -                 | Urban          | 99.4  | 105.2 | 95.8  |
| -                 | Rural          | 95.6  | 97.2  | 93.5  |
| Age group (years) |                |       |       |       |
| -                 | 18-19          | 94.7  | 101.4 | 87.3  |
| -                 | 20-29          | 100.8 | 101.7 | 99.5  |
| -                 | 30-39          | 99.3  | 106.9 | 95.7  |
| -                 | 40-49          | 95.0  | 98.7  | 93.3  |
| -                 | 50-59          | 93.4  | 96.0  | 91.6  |
| Ethnicity         |                |       |       |       |
| -                 | Malay          | 95.8  | 100.7 | 92.0  |
| -                 | Chinese        | 110.1 | 114.8 | 103.5 |
| -                 | Indian         | 82.1  | 89.7  | 69.2  |
| -                 | Bumiputera     | 95.7  | 97.2  | 92.9  |
| Sabah             |                |       |       |       |
| -                 | Bumiputera     | 99.2  | 88.4  | 105.4 |
| Sarawak           |                |       |       |       |
| -                 | Others         | 102.9 | 106.4 | 99.6  |
| -                 | Other Bumis    | 94.9  | 93.3  | 94.9  |
| Marital status    |                |       |       |       |
| -                 | Never married  | 97.8  | 101.1 | 92.3  |
| -                 | Married/cohab  | 98.6  | 101.5 | 96.6  |
| Living            |                |       |       |       |
| -                 | Divorced/separ | 90.9  | 93.7  | 87.2  |
| Living            |                |       |       |       |
| -                 | Widow          | 77.3  | ---   | 77.1  |
| Educational level |                |       |       |       |
| -                 | Non-formal     | 81.2  | 80.9  | 81.7  |
| -                 | Primary        | 96.1  | 96.1  | 96.6  |
| -                 | Secondary      | 98.1  | 103.3 | 91.8  |
| -                 | Tertiary       | 100.8 | 101.3 | 100.2 |
| -                 | Others         | 99.1  | 93.4  | 115.6 |
| Work status       |                |       |       |       |
| -                 | Government/se  | 98.6  | 100.9 | 97.8  |
| Non-government    |                |       |       |       |
| -                 | Private        | 97.3  | 99.1  | 94.1  |
| -                 | Self-employed  | 100.4 | 103.0 | 93.7  |
| -                 | Unpaid         | 104.8 | 135.7 | 104.8 |
| workers           |                |       |       |       |



|                                           |                                                   |                     |                      |                                |                  |       |
|-------------------------------------------|---------------------------------------------------|---------------------|----------------------|--------------------------------|------------------|-------|
|                                           |                                                   |                     | - Not working        | 94.5                           | 88.0             | 95.1  |
|                                           |                                                   |                     | - Retired            | 92.7                           | 85.0             | 112.1 |
|                                           |                                                   |                     | - students           | 88.4                           | 96.1             | 84.0  |
|                                           |                                                   |                     | Income group         |                                |                  |       |
|                                           |                                                   |                     | - less than RM1500   | 93.5                           | 96.0             | 91.3  |
|                                           |                                                   |                     | - RM1500- RM3500     | 102.3                          | 106.0            | 98.1  |
|                                           |                                                   |                     | - More than RM3500   | 100.7                          | 106.0            | 97.8  |
| Asma (2014) analysis of MANS 2003 data[7] | 3063 individuals aged 18 to 59 y                  | 126-item FFQ        | Age group (y)        | Mean protein intake (g/d) ± SD | Protein as % RNI |       |
|                                           |                                                   |                     | Men                  |                                |                  |       |
|                                           |                                                   |                     | - 18-29              | 110 ± 1.5                      | ---              |       |
|                                           |                                                   |                     | - 30-50              | 114 ± 1.5                      | ---              |       |
|                                           |                                                   |                     | - 51-60              | 106 ± 3.2                      | ---              |       |
|                                           |                                                   |                     | - Total for all ages | 112 ± 1.0                      | 180.4            |       |
|                                           |                                                   |                     | Women                |                                |                  |       |
|                                           |                                                   |                     | - 18-29              | 91 ± 1.1                       | ---              |       |
|                                           |                                                   |                     | - 30-50              | 97 ± 1.2                       | ---              |       |
|                                           |                                                   |                     | - 51-60              | 91 ± 1.9                       | ---              |       |
|                                           |                                                   |                     | - Total for all ages | 94.1 ± 0.8                     | 171.2            |       |
| Mirnali ni et al. (2008)[8]               | MANS 2003 data (6886 individuals aged 18 to 59 y) | Single 24-hr recall | Men                  | Mean (g/day) ± SE              | Mean % RNI       |       |
|                                           |                                                   |                     | - 18-19              | 65 ± 3.7                       | 104.8            |       |
|                                           |                                                   |                     | - 20-29              | 64 ± 1.0                       | 103.3            |       |
|                                           |                                                   |                     | - 30-39              | 67 ± 1.1                       | 108.1            |       |
|                                           |                                                   |                     | - 40-49              | 63 ± 1.0                       | 101.6            |       |
|                                           |                                                   |                     | - 50-59              | 61 ± 1.3                       | 98.4             |       |
|                                           |                                                   |                     | Women                |                                |                  |       |
|                                           |                                                   |                     | - 18-19              | 53 ± 2.6                       | 96.4             |       |
|                                           |                                                   |                     | - 20-29              | 57 ± 1.0                       | 103.6            |       |

|     |       |          |       |
|-----|-------|----------|-------|
| -   | 30-39 | 55 ± 0.9 | 100.0 |
| -   | 40-49 | 53 ± 1.0 | 96.4  |
| -   | 50-59 | 51 ± 1.3 | 92.7  |
| All |       |          |       |
| -   | 18-19 | 59 ± 2.3 | ---   |
| -   | 20-29 | 61 ± 0.7 | ---   |
| -   | 30-39 | 61 ± 0.7 | ---   |
| -   | 40-49 | 58 ± 0.7 | ---   |
| -   | 50-59 | 56 ± 0.9 | ---   |
| -   |       |          |       |

*Small studies*

| Source (y)                  | Sample                                                | Method                                     | Results       | Mean protein intake (g/d) ± SD | Protein as % RNI | <RNI No. (%)     | Meet RNI No. (%) | >RNI No. (%) |
|-----------------------------|-------------------------------------------------------|--------------------------------------------|---------------|--------------------------------|------------------|------------------|------------------|--------------|
| <i>All ages</i>             |                                                       |                                            |               |                                |                  |                  |                  |              |
| Karupai ah et al. (2013)[9] | 128 urban women aged 19 to 65 y                       | 3-day diet records (2 weekdays, 1 weekend) | Age group (y) |                                |                  |                  |                  |              |
|                             |                                                       |                                            | 19 to 29      | 71 ± 9                         | 129              |                  |                  |              |
|                             |                                                       |                                            | 30 to 50      | 71 ± 11                        | 129              |                  |                  |              |
|                             |                                                       |                                            | 51 to 59      | 71 ± 11                        | 129              |                  |                  |              |
| <i>Young adults</i>         |                                                       |                                            |               |                                |                  |                  |                  |              |
| Abdullah et al. (2012)[10]  | 200 students aged 18 to 24 y (45% males, 55% females) | Single 24-hr recall                        | Subjects      | Mean protein intake (g/d) ± SD | <RNI No. (%)     | Meet RNI No. (%) | >RNI No. (%)     |              |
|                             |                                                       |                                            | Males - 18 y  | 67.74 ± 21.22                  | ---              | ---              | ---              |              |
|                             |                                                       |                                            | - 19+ y       | 73.62 ± 19.15                  | ---              | ---              | ---              |              |

|                           |                                                       |                     |                               |                                |                              |                                 |              |
|---------------------------|-------------------------------------------------------|---------------------|-------------------------------|--------------------------------|------------------------------|---------------------------------|--------------|
|                           |                                                       |                     | Total                         | 71.33<br>±<br>20.07            | 38 (42)                      | 2 (2.4)                         | 50<br>(56.4) |
|                           |                                                       |                     | Females – 18 y                | 61.59<br>±<br>19.73            | ---                          | ---                             | ---          |
|                           |                                                       |                     | 19+ y                         | 63.59<br>±<br>20.55            | ---                          | ---                             | ---          |
|                           |                                                       |                     | Total                         | 63.01<br>±<br>20.24            | 75 (68)                      | 2 (1.9)                         | 33<br>(30.2) |
| Gan et al. (2011)[11]     | 584 students aged 18 to 24 y (41% males; 59% females) | Two 24-h recalls    | Subjects                      | Mean protein intake (g/d) ± SD | Protein as % RNI             | <RNI No. (%)                    | ≥RNI No. (%) |
|                           |                                                       |                     | Males                         | 80.6 ± 27.1                    | 128.6±43.2                   | 60(25.3)                        | 177(74.7)    |
|                           |                                                       |                     | Females                       | 60.7 ± 23.4                    | 110.6±42.6                   | 156(45.5)                       | 187(54.4)    |
| <i>Older adults</i>       |                                                       |                     |                               |                                |                              |                                 |              |
| Norsham et al. (2015)[14] | 450 women aged 30 to 65 y                             |                     | Subjects                      | Mean protein intake (g/day)    | Protein intake 10-35% energy | High protein intake >35% energy |              |
|                           |                                                       |                     | Normal (n=292)                | 59.2±21.3                      | 104 (69.3)                   | 188 (62.7)                      |              |
|                           |                                                       |                     | With breast adiposity (n=158) | 70.0±37.9                      | 46 (30.7)                    | 112 (37.3)                      |              |
| Yee et al. (2013)[12]     | 73 healthy Chinese premenopausal women aged 30 to     | Single 24-hr recall | All subjects 30 to 45 y       | Mean protein intake            | RNI for study population     |                                 |              |

|                            |                                                                                              |                              |                                            |                                |                                                                                |
|----------------------------|----------------------------------------------------------------------------------------------|------------------------------|--------------------------------------------|--------------------------------|--------------------------------------------------------------------------------|
|                            | 45 y from Klang Valley                                                                       |                              |                                            | (g/d)<br>± SD                  |                                                                                |
|                            |                                                                                              |                              |                                            | 69 ± 30<br>(range 15-175)      | RNI = 55 g/day (presented for comparison only; no computation done by authors) |
| Sulaiman et al. (2011)[13] | 301 women (151 in rural areas, 150 in urban areas) aged 21 to 49 y (mean age 38.05 ± 7.03 y) | Single 24-h recall; MANS FFQ | Subjects according to food security status | Mean protein intake (g/d) ± SD | Protein as % RNI (mean ± SD)                                                   |
|                            |                                                                                              |                              | Rural respondent                           |                                |                                                                                |
|                            |                                                                                              |                              | - Food secure                              | 85.76 ± 29.06                  | 154.42 ± 54.23                                                                 |
|                            |                                                                                              |                              | - Moderately insecure                      | 82.09 ± 35.78                  | 148.45 ± 65.49                                                                 |
|                            |                                                                                              |                              | - Severely insecure                        | 73.32 ± 29.21                  | 134.47 ± 53.61                                                                 |
|                            |                                                                                              |                              | Urban respondent                           |                                |                                                                                |
|                            |                                                                                              |                              | - Food secure                              | 64.37 ± 22.47                  | 117.03 ± 40.05                                                                 |
|                            |                                                                                              |                              | - Moderately insecure                      | 59.29 ± 24.68                  | 107.80 ± 44.87                                                                 |
|                            |                                                                                              |                              | - Severely insecure                        | 55.03 ± 23.44                  | 100.06 ± 42.61                                                                 |
| Pon et al. (2006)[15]      | 360 urban middle-aged women                                                                  | Quantitative FFQ             | Subjects                                   | Mean protein intake            | Protein as % RDA                                                               |

|                       |                      |
|-----------------------|----------------------|
| aged 51.65 ±<br>5.4 y | (g/day) ±<br>SD      |
| Females (all)         | 59.4 ± 144.8<br>10.4 |
| Premenopausal         | 59.8 ± 145.9<br>10.9 |
| Postmenopausal        | 58.7 ± 143.2<br>9.5  |

--- No data

Table S4. Findings on fat intake of Malaysian adults

| Source                               | Sample                               | Method                                | Results                                                                                                                                                                                                                                                 |
|--------------------------------------|--------------------------------------|---------------------------------------|---------------------------------------------------------------------------------------------------------------------------------------------------------------------------------------------------------------------------------------------------------|
| FAO food balance sheet (2013)[5]     | n/a                                  | Calculated from available food supply | Fat supply (g/capita/day) = 89.74<br>Fat supply (kcal/capita/day) = 807.66; comprises approximately 28% of available energy/capita/day                                                                                                                  |
| <i>Nationwide studies</i>            |                                      |                                       |                                                                                                                                                                                                                                                         |
| Mahmud et al. (2015)[6]              | MANS 2014 sample                     | Single 24-hr recall                   | Prevalence of Malaysian adults that met the RNI for fat = 3.4% (95% CI 2.7, 4.4)<br>- Males = 3.1% (95% CI 2.2, 4.5)<br>- Females = 3.7% (95% CI 2.7, 5.1)<br>94.9% of adults had intakes exceeding the RNI<br>1.7% of adults had intakes below the RNI |
| MANS 2014[16]                        | 2973 individuals aged 18 to 59 years | Single 24-hr recall                   | Median fat intake (both sexes) = 46.43 g/day<br>Median percentage of total energy contributed by fat = 29%; similar in men and women                                                                                                                    |
| Asma (2014) analysis of MANS 2003[7] | 3063 individuals aged 18 to 59 y     | 126-item FFQ                          | Age group (y)      Mean fat intake (g/day) ± SD      Fat as mean % RNI<br>Men (RNI 54-82 g; 20-30% TEI)<br>- 18-29      65 ± 1.9      ---<br>- 30-50      67 ± 2.1      ---<br>- 51-60      58 ± 4.4      ---                                           |

|   |                                 |            |       |
|---|---------------------------------|------------|-------|
| - | Total for all ages              | 65 ± 1.4   | 120.7 |
|   | Women (RNI 46-70 g; 20-30% TEI) |            |       |
| - | 18-29                           | 52 ± 1.4   | ---   |
| - | 30-50                           | 53 ± 1.5   | ---   |
| - | 51-60                           | 42 ± 1.5   | ---   |
| - | Total for all ages              | 51.4 ± 0.9 | 111.8 |

Mirnalini et al. (2008)[8] MANS 2003 sample; 6886 individuals aged 18 to 59 y Single 24-hr recall Median intake for both sexes (all age groups) = 46 g/day

|   | Men   | Mean fat intake (g/day) ± SE | Mean as % TEI |
|---|-------|------------------------------|---------------|
| - | 18-19 | 56 ± 3.7                     | ---           |
| - | 20-29 | 56 ± 0.9                     | ---           |
| - | 30-39 | 56 ± 1.0                     | ---           |
| - | 40-49 | 53 ± 1.1                     | ---           |
| - | 50-59 | 49 ± 1.4                     | ---           |
|   | Women |                              |               |
| - | 18-19 | 46 ± 1.9                     | ---           |
| - | 20-29 | 48 ± 0.9                     | ---           |
| - | 30-39 | 45 ± 0.8                     | ---           |
| - | 40-49 | 43 ± 1.0                     | ---           |
| - | 50-59 | 41 ± 1.2                     | ---           |
|   | All   |                              |               |
| - | 18-19 | 51 ± 2.1                     | ---           |
| - | 20-29 | 52 ± 0.7                     | ---           |
| - | 30-39 | 51 ± 0.6                     | ---           |
| - | 40-49 | 48 ± 0.7                     | ---           |
| - | 50-59 | 45 ± 1.0                     | ---           |

*Small studies*

**Source (y)**      **Sample**      **Method**      **Results**

*All ages*

|                                |                                                         |                                       |                      |                                                                |                         |                  |              |
|--------------------------------|---------------------------------------------------------|---------------------------------------|----------------------|----------------------------------------------------------------|-------------------------|------------------|--------------|
| Kaur et al. (2016)[17]         | 101 Malaysian Punjabis aged 18 to 59 y                  | 2-day diet records                    | Subjects             | Median fat intake (g/day, (P <sub>5</sub> , P <sub>95</sub> )) | Fat as % energy mean±SD |                  |              |
|                                |                                                         |                                       | All (both sexes)     | 61.48 (34.1, 93.2)                                             | 30.3±5.9                |                  |              |
| <i>Young adults</i>            |                                                         |                                       |                      |                                                                |                         |                  |              |
| Shahril et al. (2013)[18]      | 380 students aged 18 to 24 y                            | Diet history for the last 7 days, FFQ | Subjects             | Mean fat intake (g/day) at baseline                            | Fat as % energy         |                  |              |
|                                |                                                         |                                       | - Intervention group | ---                                                            | 34.0±0.3                |                  |              |
|                                |                                                         |                                       | - Control group      | ---                                                            | 34.4±0.3                |                  |              |
| Abdull Hakim et al. (2012)[10] | n=200 students aged 18 to 24 y (45% males, 55% females) | Single 24-hr recall                   | Subjects             | Mean fat intake (g/d) ± SD                                     | <RNI No. (%)            | Meet RNI No. (%) | >RNI No. (%) |
|                                |                                                         |                                       | Males - 18 y         | 91.11 ± 41.84                                                  | ---                     | ---              | ---          |
|                                |                                                         |                                       | - 19+ y              | 78.36 ± 25.59                                                  | ---                     | ---              | ---          |
|                                |                                                         |                                       | Total                | 83.32 ± 33.25                                                  | 19 (21.1)               | 34 (37.5)        | 37 (41.5)    |
|                                |                                                         |                                       | Females - 18 y       | 79.19 ± 26.31                                                  | ---                     | ---              | ---          |
|                                |                                                         |                                       | - 19+ y              | 72.04 ± 26.12                                                  | ---                     | ---              | ---          |
|                                |                                                         |                                       | Total                | 74.12 ± 26.26                                                  | 16 (14.6)               | 32 (28.9)        | 62 (56.5)    |





|                           |                                                                            |                                               |                                        |                              |                                           |                                     |
|---------------------------|----------------------------------------------------------------------------|-----------------------------------------------|----------------------------------------|------------------------------|-------------------------------------------|-------------------------------------|
| Norsham et al. (2015)[14] | 450 women (Malaysian, Chinese, Indian) aged 30 to 60 without breast cancer | Diet history questionnaire                    | Subjects according to breast adiposity | Mean fat intake (g/d) ± SD   | Fat intake 25-35% energy No. (%)          | High fat intake >35% energy No. (%) |
|                           |                                                                            |                                               | - Normal breast density                | 58.3 ± 22.5                  | 38 (53.5)                                 | 254 (67.0)                          |
|                           |                                                                            |                                               | - Adiposity of the breast              | 63.5 ± 21.7                  | 33 (46.5)                                 | 125 (33.0)                          |
| Yee et al. (2013)[12]     | 73 healthy Chinese premenopausal women aged 30 to 45 y from Klang Valley   | Single 24-hr recall                           | Subjects                               | Mean fat intake (g/day) ± SD | Fat as % energy                           |                                     |
|                           |                                                                            |                                               | All subjects 30 to 45 y                | 61 ± 23                      | 36                                        |                                     |
| Eng & Moy (2011)[21]      | 151 Malay adults (37.6% males, 62.4% females) mean age 49.8 ± 4.1 y        | 3-day dietary records (2 weekdays, 1 weekend) | Subjects                               | Mean fat intake (g/d) ± SD   | Fat as % energy                           |                                     |
|                           |                                                                            |                                               | All (both sexes)                       | Total fat = 66.8 ± 16.9      | 32.8 ± 5.2                                |                                     |
|                           |                                                                            |                                               |                                        | Saturated fat = 22.7 ± 7.04  | % energy from saturated fat = 10.1 ± 2.91 |                                     |
|                           |                                                                            |                                               |                                        | MUFA = 19.1 ± 5.51           | % energy from MUFA = 8.52 ± 2.27          |                                     |
|                           |                                                                            |                                               |                                        | PUFA = 12.0 ± 4.46           | % energy from PUFA = 5.34 ± 1.97          |                                     |

|                            |                                                                                              |                                  |                                            |                              |                                   |                                       |
|----------------------------|----------------------------------------------------------------------------------------------|----------------------------------|--------------------------------------------|------------------------------|-----------------------------------|---------------------------------------|
| Sulaiman et al. (2011)[13] | 301 women (151 in rural areas, 150 in urban areas) aged 21 to 49 y (mean age 38.05 ± 7.03 y) | Single 24-h recall; MANS FFQ     | Subjects according to food security status | Mean fat intake (g/day) ± SD | Fat as % energy (mean ± SD)       |                                       |
|                            |                                                                                              |                                  | Rural respondent                           |                              |                                   |                                       |
|                            |                                                                                              |                                  | - Food secure                              | 69.85 ± 27.96                | 32.28 ± 4.98                      |                                       |
|                            |                                                                                              |                                  | - Moderately insecure                      | 57.34 ± 27.29                | 29.62 ± 6.73                      |                                       |
|                            |                                                                                              |                                  | - Severely insecure                        | 50.89 ± 24.84                | 27.97 ± 6.70                      |                                       |
|                            |                                                                                              |                                  | Urban respondent                           |                              |                                   |                                       |
|                            |                                                                                              |                                  | - Food secure                              | 42.24 ± 14.16                | 26.88 ± 5.92                      |                                       |
|                            |                                                                                              |                                  | - Moderately insecure                      | 34.50 ± 16.69                | 23.55 ± 6.49                      |                                       |
|                            |                                                                                              |                                  | - Severely insecure                        | 32.81 ± 17.47                | 24.39 ± 6.11                      |                                       |
| Shahar et al. (2011)[24]   | 70 healthy men aged 40 to 80 y (mean = 67.8 y)                                               | Diet history questionnaire (DHQ) | Mean fat intake ± SD (g/day)               |                              | Fat as % energy (mean ± SD)       |                                       |
|                            |                                                                                              |                                  | 45.0 ± 13.1                                |                              | 25.1 ± 5.9 %                      |                                       |
| Lee et al. (2010)[22]      | 115 women aged 18 to 59 y (mean age 37.2 ± 7.6 y)                                            | Diet history over 7 days         | Subjects                                   | ---                          | Fat as % energy (mean ± SD)       |                                       |
|                            |                                                                                              |                                  | - normal weight                            | ---                          | 31.0 ± 6.4                        |                                       |
|                            |                                                                                              |                                  | - overweight                               | ---                          | 32.4 ± 6.6                        |                                       |
|                            |                                                                                              |                                  | - obese                                    | ---                          | 33.5 ± 5.8                        |                                       |
| Asma et al. (2010)[23]     | 150 married couples aged 20 and above (mean age husbands)                                    | 2-day 24-hr recall, FFQ          | Subjects                                   | ---                          | Total fat as % energy (mean ± SD) | Saturated fat as % energy (mean ± SD) |

43.33 ± 11.16  
 y; wives 41.28  
 ± 10.93 y)

- husbands --- 28.6 ± 5.8 4.3 ± 2.8  
 - wives --- 29.7 ± 6.2 4.9 ± 3.1

--- No data

Table S5. Findings on carbohydrate intake of Malaysian adults

| Source<br>(y)                                | Sample | Method                                                                 | Results                                                                                                                                                                                        |                                                                           |                                                                                                       |
|----------------------------------------------|--------|------------------------------------------------------------------------|------------------------------------------------------------------------------------------------------------------------------------------------------------------------------------------------|---------------------------------------------------------------------------|-------------------------------------------------------------------------------------------------------|
| FAO<br>food<br>balance<br>sheet<br>(2013)[5] | n/a    | Per capita<br>values<br>calculated<br>from<br>available<br>food supply | Supply for<br>carbohydrate-<br>source foods<br><br>- Cereals<br>excluding<br>beverages<br>- Sugar &<br>sweeteners<br>- Fruits<br>excluding wine<br>- Vegetables<br>- Starchy<br>roots<br>Total | Available<br>kcal/capita/day<br><br>1279<br>411<br>57<br>56<br>31<br>1834 | Estimated<br>% of per<br>capita<br>available<br>energy *<br><br>44 %<br>14 %<br>2%<br>2%<br>1%<br>63% |

*Nationwide studies*

|                                |                                |                        |                                                                                                                                                                                                                                        |
|--------------------------------|--------------------------------|------------------------|----------------------------------------------------------------------------------------------------------------------------------------------------------------------------------------------------------------------------------------|
| Mahmu<br>d et al.<br>(2015)[6] | MANS 2014<br>sample            | Single 24-hr<br>recall | Prevalence of adults that met the RNI for<br>carbohydrate<br>- Males = 39.1% (95% CI 35.6, 42.7)<br>- Females = 41.5% (95% CI 38.3, 44.7)<br>6.3% of adults had intakes exceeding the RNI<br>53.5% of adults had intakes below the RNI |
| MANS<br>2014[16]               | 4000 adults<br>aged 18 to 59 y | Single 24-hr<br>recall | Median daily intake of carbohydrate was 195 g;<br>median % of energy from carbohydrate was 55%                                                                                                                                         |
| Mirnalini<br>et al.            | MANS 2003<br>sample            | Single 24-hr<br>recall | Mean CHO intake (both sexes, all age groups) = 232<br>± 1.4 g/day; contributed 59% of energy intake<br>Median CHO intake = 221 g/day                                                                                                   |

(2008)

[8]

|                                                     |                                        |                 |                                                                                                                                                           |                                                                                                                                                   |                                                                                                   |
|-----------------------------------------------------|----------------------------------------|-----------------|-----------------------------------------------------------------------------------------------------------------------------------------------------------|---------------------------------------------------------------------------------------------------------------------------------------------------|---------------------------------------------------------------------------------------------------|
| Asma<br>(2014)<br>analysis<br>of<br>MANS<br>2003[7] | 3063<br>individuals<br>aged 18 to 59 y | 126-item<br>FFQ | Age group (y)<br><br>Men<br><br>- 18-29<br>- 30-50<br>- 51-60<br>- Total (all<br>ages)<br>Women<br>- 18-29<br>- 30-50<br>- 51-60<br>- Total (all<br>ages) | Mean CHO intake<br>(g/day) ± SD<br><br>461 ± 4.2<br>463 ± 3.3<br>447 ± 7.5<br>460 ± 2.5<br><br>393 ± 3.5<br>403 ± 3.1<br>391 ± 7.2<br>397.5 ± 2.2 | Mean<br>%RNI<br>(55-70%<br>TEI)<br><br>---<br>---<br>---<br>74.4<br><br>---<br>---<br>---<br>74.9 |
|-----------------------------------------------------|----------------------------------------|-----------------|-----------------------------------------------------------------------------------------------------------------------------------------------------------|---------------------------------------------------------------------------------------------------------------------------------------------------|---------------------------------------------------------------------------------------------------|

*Small studies*

| Source<br>(y)                    | Sample                                                                 | Method                | Results                                      |
|----------------------------------|------------------------------------------------------------------------|-----------------------|----------------------------------------------|
| Kaur et<br>al.<br>(2016)[1<br>7] | 100 Malaysian<br>Punjabis aged<br>18 to 59 y (mean<br>age 31.4 ± 11 y) | 3-day 24 h<br>recalls | Median CHO<br>intake<br>(g/day)<br><br>243.9 |

% energy from CHO  
Mean ±SD  
54.6 ±7.2

*Young  
adults*

|                                     |                                 |                                             |                                        |                                            |                                                            |
|-------------------------------------|---------------------------------|---------------------------------------------|----------------------------------------|--------------------------------------------|------------------------------------------------------------|
| Shahril<br>et al.<br>(2013)[1<br>8] | 380 students<br>aged 18 to 24 y | Diet history<br>for the last 7<br>days, FFQ | Treatment<br>group<br><br>Intervention | Mean CHO intake<br>(g/day) ± SD<br><br>--- | %<br>energy<br>from<br>CHO<br>Mean<br>±SD<br>51.9 ±<br>0.4 |
|-------------------------------------|---------------------------------|---------------------------------------------|----------------------------------------|--------------------------------------------|------------------------------------------------------------|

|                          |                                                                                                                 |                                   |                   |                              |                                |                       |                            |
|--------------------------|-----------------------------------------------------------------------------------------------------------------|-----------------------------------|-------------------|------------------------------|--------------------------------|-----------------------|----------------------------|
|                          |                                                                                                                 |                                   | Control           |                              | ---                            |                       | 51.6 ±<br>0.4              |
| Gan et al. (2011)[11]    | n=584 students aged 18 to 24 y (41% males; 59% females)                                                         | Two 24-h recalls                  | Subjects          | Mean CHO intake ± SD (g/day) | CHO intake <55% energy No. (%) | 55-70% energy No. (%) | >70% energy No. (%)        |
|                          |                                                                                                                 |                                   | Male              | 280 ± 91                     | 153 (64.6)                     | 80 (33.8)             | 4 (1.7)                    |
|                          |                                                                                                                 |                                   | Female            | 214 ± 73                     | 208 (60.6)                     | 135 (39.4)            | 0 (0.0)                    |
| Ismail et al. (2012)[19] | 88 adults aged 18 to 30 y                                                                                       | 3 day food diaries                | Subjects          |                              | Mean CHO intake (g/day) ± SD   |                       | % energy from CHO Mean ±SD |
|                          |                                                                                                                 |                                   | Males             |                              |                                |                       |                            |
|                          |                                                                                                                 |                                   | - Cases with acne |                              | ---                            |                       | 50.5 ± 3.6                 |
|                          |                                                                                                                 |                                   | - Controls        |                              | ---                            |                       | 51.7 ± 4.7                 |
|                          |                                                                                                                 |                                   | Females           |                              |                                |                       |                            |
|                          |                                                                                                                 |                                   | - Cases with acne |                              | ---                            |                       | 51.8 ± 6.6                 |
|                          |                                                                                                                 |                                   | - Controls        |                              | ---                            |                       | 53.1 ± 4.3                 |
| <i>Older adults</i>      |                                                                                                                 |                                   |                   |                              |                                |                       |                            |
| Shyam et al. (2015)[20]  | 77 nondiabetic women with previous GDM aged 20 to 40 y receiving conventional dietary recommendations (CHDR) or | 3-day dietary records at baseline | Treatment group   |                              | Mean CHO intake (g/day) ± SD   |                       | % energy from CHO Mean ±SD |

|                            |                                                                                              |                              |                            |                              |                             |                                        |
|----------------------------|----------------------------------------------------------------------------------------------|------------------------------|----------------------------|------------------------------|-----------------------------|----------------------------------------|
|                            | low GI education (LGI)                                                                       |                              |                            |                              |                             |                                        |
|                            |                                                                                              |                              | - CHDR                     | 245 ± 75                     |                             | 55 ± 9                                 |
|                            |                                                                                              |                              | - LGI                      | 225 ± 68                     |                             | 53 ± 7                                 |
| Norsham et al. (2015)[14]  | 450 women aged 30 to 65 y                                                                    | Diet history questionnaire   | Subjects                   | Mean CHO intake ±SD (g/day)  | CHO intake 55-75% of energy | High CHO intake >75% of energy No. (%) |
|                            |                                                                                              |                              | - Normal                   | 162.7±46.5                   | 52 (66.7)                   | 240 (64.5)                             |
|                            |                                                                                              |                              | - With breast adiposity    | 171.3±55.9                   | 26 (33.3)                   | 132 (35.5)                             |
| Sulaiman et al. (2011)[13] | 301 women (151 in rural areas, 150 in urban areas) aged 21 to 49 y (mean age 38.05 ± 7.03 y) | Single 24-h recall; MANS FFQ | Respondents                | Mean CHO intake (g/day) ± SD |                             | % energy from CHO Mean ±SD             |
|                            |                                                                                              |                              | Rural                      |                              |                             |                                        |
|                            |                                                                                              |                              | - Food secure              | ---                          |                             | 50 ± 5.3                               |
|                            |                                                                                              |                              | - Moderate food insecurity | ---                          |                             | 51 ± 8.8                               |
|                            |                                                                                              |                              | - Severe food insecurity   | ---                          |                             | 53 ± 8.3                               |
|                            |                                                                                              |                              | Urban                      |                              |                             |                                        |
|                            |                                                                                              |                              | - Food secure              | ---                          |                             | 56 ± 8.2                               |
|                            |                                                                                              |                              | - Moderate food insecurity | ---                          |                             | 59 ± 7.4                               |
|                            |                                                                                              |                              | - Severe food insecurity   | ---                          |                             | 57 ± 8.3                               |
| Shahar et al. (2011)[24]   | 70 healthy men aged 67.8 ±4.6 y                                                              | Diet history questionnaire   |                            | Mean CHO intake ± SD (g/day) |                             | CHO as % TEI (mean ±SD)                |

|                      |                                                                               |                                      |               |                                    |                   |             |
|----------------------|-------------------------------------------------------------------------------|--------------------------------------|---------------|------------------------------------|-------------------|-------------|
|                      |                                                                               |                                      |               | 238 ± 54                           |                   | 58.8 ± 7.1% |
| Lee et al. (2010)[2] | 47 normal energy reporters, Malay women aged 20 to 59 y (mean age 37.2±7.6 y) | Food history over a period of 7 days | Weight status | Mean CHO intake (g/1000 kcal) ± SD | % energy from CHO | Mean ± SD   |
|                      |                                                                               |                                      | - Normal      | 138 ± 17                           |                   | 55.1 ± 6.6  |
|                      |                                                                               |                                      | - Overweight  | 141 ± 23                           |                   | 55.9 ± 9.4  |
|                      |                                                                               |                                      | - Obese       | 136 ± 21                           |                   | 54.4 ± 8.4  |

--- No data

\* Calculated from food balance sheet data

Table S6. Assessment for risk of bias

| Study                | Selection bias  |                                  | Performance bias               |                       | Reporting bias                        |                                                          | Total score | Classification of risk of bias |
|----------------------|-----------------|----------------------------------|--------------------------------|-----------------------|---------------------------------------|----------------------------------------------------------|-------------|--------------------------------|
|                      | Sampling method | Representative of age 19 to 59 y | Dietary assessment method used | Usual intake measured | Included/excluded over/underreporters | Use of free vs. all including payment-requiring database |             |                                |
| Norsham et al. 2015  | 2               | 1                                | 4                              | 2                     | 2                                     | 2                                                        | 13          | moderate                       |
| Shyam et al. 2015    | 2               | 2                                | 4                              | 2                     | 2                                     | 2                                                        | 14          | high                           |
| Karupiah et al. 2013 | 1               | 1                                | 4                              | 2                     | 2                                     | 2                                                        | 12          | moderate                       |
| Shahril et al. 2013  | 1               | 2                                | 4                              | 2                     | 2                                     | 2                                                        | 13          | moderate                       |

|                          |   |   |   |   |   |   |                        |                  |
|--------------------------|---|---|---|---|---|---|------------------------|------------------|
| Yee et al. 2013          | 2 | 2 | 5 | 2 | 2 | 2 | 15                     | high             |
| Abdull Hakim et al. 2012 | 2 | 2 | 5 | 2 | 2 | 2 | 15                     | high             |
| Ismail et al. 2012       | 2 | 2 | 3 | 2 | 2 | 2 | 13                     | moderate         |
| Eng & Moy 2011           | 2 | 2 | 4 | 2 | 2 | 2 | 14                     | high             |
| Gan et al. 2011          | 1 | 2 | 2 | 2 | 2 | 2 | 11                     | moderate         |
| Shahar et al. 2011       | 2 | 2 | 4 | 2 | 2 | 2 | 14                     | high             |
| Sulaiman et al. 2011     | 1 | 2 | 5 | 2 | 2 | 2 | 14                     | high             |
| Asma et al. 2010         | 2 | 2 | 2 | 2 | 2 | 2 | 12                     | moderate         |
| Lee et al. 2010          | 2 | 1 | 4 | 2 | 1 | 2 | 12                     | moderate         |
| Pon et al. 2006          | 2 | 2 | 6 | 2 | 2 | 2 | 16                     | high             |
|                          |   |   |   |   |   |   | Over all score = 13.35 | MODERATE TO HIGH |

Scoring guide:

| Selection bias indicators                  | Score                                             |
|--------------------------------------------|---------------------------------------------------|
| - Sampling method                          | 1 = random sampling; 2 = purposive or convenience |
| - Representative of adults aged 19 to 59 y | 1 = yes; 2 = no, specific groups only             |
| Performance bias indicators                |                                                   |
| - Dietary assessment method used           | 1 = food weighing                                 |



|                                                |                                                                                                                                                     |
|------------------------------------------------|-----------------------------------------------------------------------------------------------------------------------------------------------------|
|                                                | 2 = multiple 24-h recalls<br>3 = food diary (multiple days)<br>4 = diet history<br>5 = single 24-h recall<br>6 = food frequency questionnaire (FFQ) |
| - Usual intake measured                        | 1 = yes; 2 = no                                                                                                                                     |
| Reporting bias indicator                       |                                                                                                                                                     |
| - Included over/underreporters                 | 1 = no; 2 = yes                                                                                                                                     |
| - Use of free databases only vs. all databases | 1 = all databases used; 2 = only free databases used                                                                                                |

Total score classification: 6-9 (low risk of bias); 10-13 (moderate risk of bias); 14-16 (high risk of bias)

Table S7. Sources of macronutrients in included studies

| <b>Sources of macronutrients</b> |                                                                         |                                                                                                                       |                                                                                                            |
|----------------------------------|-------------------------------------------------------------------------|-----------------------------------------------------------------------------------------------------------------------|------------------------------------------------------------------------------------------------------------|
| <b>Author (y)</b>                | <b>Carbohydrates (CHO)</b>                                              | <b>Protein</b>                                                                                                        | <b>Fat</b>                                                                                                 |
| FAO food balance sheet (2013)[5] | Available supply of CHO sources; kg/capita/day (% of total CHO supply*) | % protein supply from<br>- Vegetal products = 44% (36.19 g/capita/day)<br>- Animal products = 56% (45.4 g/capita/day) | % fat from<br>- Vegetal products = 62% (55.8 g/capita/day)<br>- Animal products = 38% (33.86 g/capita/day) |
|                                  | - Cereals excluding beverages = 150.12 (46%)                            | Animal protein sources; kg/capita/day (% of total protein supply*)                                                    | Vegetable fat sources; Kg/capita/day (% of veg. fat supply*)                                               |
|                                  | - Vegetables = 70.43 (22%)                                              | - Fish, seafood = 58.97 (34%)                                                                                         | - Vegetable oils = 16.63 (75% of veg. fat supply)                                                          |
|                                  | - Fruits excluding wine = 45.29 (14%)                                   | - Meat & poultry = 56.25 (33%)                                                                                        | • palm oil = 6.89 (41% of veg. oil)                                                                        |
|                                  | - Sugar & sweeteners = 44.12 (14%)                                      | • Meat (bovine, pig, mutton & goat) = 15.22 kg (28% of meat supply)                                                   | • palm kernel oil = 4.37 (26%)                                                                             |
|                                  | - Starchy roots = 14.91 (5%)                                            | • Poultry = 41.04 kg (73% of meat supply)                                                                             | • soyabean oil = 2.35 (14%)                                                                                |
|                                  | Available cereals (kg/capita/day)                                       | - Milk = 25.28 (15%)                                                                                                  | • Coconut oil = 1.13 (7%)                                                                                  |
|                                  | - Rice, milled = 81.25                                                  | - Eggs = 16.57 (10%)                                                                                                  | • oilcrops, other = 0.97 (6%)                                                                              |

- Wheat & wheat products = 51.04
- Maize & products = 15.82
- Cereals, other = 1.09
- Oats = 0.87
- Pulses, nuts, seeds = 10.04 (6%)
- Offal edible = 4.03 (2%)
- Maize germ oil = 0.33 (2%)
- Sesame oil = 0.32 (2%)
- Ground nut oil = 0.18 (1%)
- Oilcrops = 5.49 (25% of veg. fat supply)
- Animal fat sources (visible fat supply)
- Saturate d fat      Kg/capita/ day (% of animal fat supply\*)
- Fat, animal raw      0.69 (63%)
- Butter, ghee      0.32 (29%)
- Cream      0.02 (2%)
- Total saturate d fat      1.03 (94%)
- Unsaturated fat
- Fish liver oil      0.07 (6%)

*Nation wide studies*

|                |                                                                                                                                                                                                                                                                                    |                                                                                                                                                                             |    |
|----------------|------------------------------------------------------------------------------------------------------------------------------------------------------------------------------------------------------------------------------------------------------------------------------------|-----------------------------------------------------------------------------------------------------------------------------------------------------------------------------|----|
| MANS 2014[16 ] | <ul style="list-style-type: none"> <li>Top carbohydrate-source foods consumed daily by adults and % consuming</li> <li>- White rice = 89.8%</li> <li>- Sugar (white, brown, Melaka) = 55.9%</li> <li>- Leafy green vegetables = 43.2%</li> <li>- Condensed milk = 23.5%</li> </ul> | <ul style="list-style-type: none"> <li>Top protein-source foods consumed daily by adults (% consuming)</li> <li>- Marine fish (29.4%)</li> <li>- Hen egg (14.2%)</li> </ul> | NR |
|----------------|------------------------------------------------------------------------------------------------------------------------------------------------------------------------------------------------------------------------------------------------------------------------------------|-----------------------------------------------------------------------------------------------------------------------------------------------------------------------------|----|

|                                                                         |                                                                         |    |
|-------------------------------------------------------------------------|-------------------------------------------------------------------------|----|
| - Cream crackers = 12.9%                                                |                                                                         |    |
| -                                                                       |                                                                         |    |
| Top carbohydrate-source foods consumed weekly by adults and % consuming | Top protein-source foods consumed weekly by adults (% consuming)        | NR |
| - Cabbage = 55.7%                                                       | - Hen egg = 70.6%                                                       |    |
| - Local kuih = 53.9%                                                    | - Chicken = 66.9%                                                       |    |
| - White bread = 50.9%                                                   | - Marine fish = 56.4%                                                   |    |
| - Leafy green vegetables = 47.3%                                        | - Other types of legumes (long bean, French bean, kacang botol) = 47.6% |    |
| - Noodles = 46.7%                                                       |                                                                         |    |

*Small studies*

*All ages*

|                            |                                                                                     |                                                                                |                                                 |                     |      |      |
|----------------------------|-------------------------------------------------------------------------------------|--------------------------------------------------------------------------------|-------------------------------------------------|---------------------|------|------|
| Sulaiman et al. (2011)[13] | No. of servings per day for carbohydrate-source food groups by food security status | No. of servings per day for protein-source food groups by food security status | NR                                              |                     |      |      |
|                            | Grains & cereals (no. of svgs/day)                                                  | Fruits & vegetables (no. of svgs/day)                                          | Meat, fish, poultry & legumes (no. of svgs/day) |                     |      |      |
|                            | Milk & dairy products (no. of svgs/day)                                             |                                                                                |                                                 |                     |      |      |
|                            | Food-secure                                                                         | 6.44                                                                           | 1.53                                            | Food-secure         | 2.83 | 0.52 |
|                            | Moderate insecurity                                                                 | 6.42                                                                           | 1.62                                            | Moderate insecurity | 3.08 | 0.29 |
|                            | Severe insecurity                                                                   | 6.38                                                                           | 1.14                                            | Severe insecurity   | 2.34 | 0.23 |

*Young adults*

| Shahril et al. (2013)[18]      | Mean daily servings of carbohydrate-source food groups                                                                                                                                                                                                                                                                                                                                                                                          | Mean daily servings of protein-source food groups                                                                                                                                                                            | Mean daily servings of fat-source foods                                    |              |                    |      |      |            |      |      |        |      |      |                  |      |      |               |      |     |                                                                                                                                                                                                                                                                                                                                                            |  |           |              |              |      |      |      |      |      |      |      |      |         |      |      |  |
|--------------------------------|-------------------------------------------------------------------------------------------------------------------------------------------------------------------------------------------------------------------------------------------------------------------------------------------------------------------------------------------------------------------------------------------------------------------------------------------------|------------------------------------------------------------------------------------------------------------------------------------------------------------------------------------------------------------------------------|----------------------------------------------------------------------------|--------------|--------------------|------|------|------------|------|------|--------|------|------|------------------|------|------|---------------|------|-----|------------------------------------------------------------------------------------------------------------------------------------------------------------------------------------------------------------------------------------------------------------------------------------------------------------------------------------------------------------|--|-----------|--------------|--------------|------|------|------|------|------|------|------|------|---------|------|------|--|
|                                | <ul style="list-style-type: none"> <li>- Rice = 1.7</li> <li>- Vegetables = 1.4</li> <li>- Beverages with sweetened condensed milk = 1.0</li> <li>- Bread = 0.8</li> <li>- Biscuits = 0.6</li> <li>- Fruits &amp; 100% fruit juice = 0.4</li> <li>- Beverages with added sugar = 0.4</li> <li>- Noodles = 0.3</li> <li>- Sweet dessert = 0.2</li> <li>- Cereals = 0.1</li> </ul>                                                                | <ul style="list-style-type: none"> <li>- Poultry = 1.6</li> <li>- Fish = 0.2</li> <li>- Meat = 0.2</li> <li>- Milk = 0.1</li> <li>- Dairy products = 0.1</li> <li>- Egg = 0.1</li> <li>- Nuts &amp; legumes = 0.0</li> </ul> | <ul style="list-style-type: none"> <li>- Deep-fried foods = 0.2</li> </ul> |              |                    |      |      |            |      |      |        |      |      |                  |      |      |               |      |     |                                                                                                                                                                                                                                                                                                                                                            |  |           |              |              |      |      |      |      |      |      |      |      |         |      |      |  |
| Abdull Hakim et al. (2012)[10] | % of students who ate vegetables daily = 43% of males, 42% of females<br>% of students who ate fruits daily = 14% of males, 17% of females                                                                                                                                                                                                                                                                                                      | NR                                                                                                                                                                                                                           | NR                                                                         |              |                    |      |      |            |      |      |        |      |      |                  |      |      |               |      |     |                                                                                                                                                                                                                                                                                                                                                            |  |           |              |              |      |      |      |      |      |      |      |      |         |      |      |  |
| Gan et al. (2011)[11]          | Daily intake of carbohydrate-source foods (% of subjects)                                                                                                                                                                                                                                                                                                                                                                                       | Daily intake of protein-source foods (% of subjects)                                                                                                                                                                         | NR                                                                         |              |                    |      |      |            |      |      |        |      |      |                  |      |      |               |      |     |                                                                                                                                                                                                                                                                                                                                                            |  |           |              |              |      |      |      |      |      |      |      |      |         |      |      |  |
|                                | <table border="1"> <thead> <tr> <th></th> <th>Male s (%)</th> <th>Fema les (%)</th> </tr> </thead> <tbody> <tr> <td>Bread/rice/noodles</td> <td>72.5</td> <td>70.9</td> </tr> <tr> <td>Vegetables</td> <td>61.7</td> <td>60.8</td> </tr> <tr> <td>Fruits</td> <td>24.9</td> <td>23.1</td> </tr> <tr> <td>100% fruit juice</td> <td>22.0</td> <td>14.4</td> </tr> <tr> <td>Canned drinks</td> <td>21.1</td> <td>7.8</td> </tr> </tbody> </table> |                                                                                                                                                                                                                              | Male s (%)                                                                 | Fema les (%) | Bread/rice/noodles | 72.5 | 70.9 | Vegetables | 61.7 | 60.8 | Fruits | 24.9 | 23.1 | 100% fruit juice | 22.0 | 14.4 | Canned drinks | 21.1 | 7.8 | <table border="1"> <thead> <tr> <th></th> <th>Males (%)</th> <th>Fema les (%)</th> </tr> </thead> <tbody> <tr> <td>Meat/chicken</td> <td>70.9</td> <td>59.4</td> </tr> <tr> <td>Fish</td> <td>40.1</td> <td>33.8</td> </tr> <tr> <td>Milk</td> <td>27.3</td> <td>21.6</td> </tr> <tr> <td>Legumes</td> <td>27.0</td> <td>17.8</td> </tr> </tbody> </table> |  | Males (%) | Fema les (%) | Meat/chicken | 70.9 | 59.4 | Fish | 40.1 | 33.8 | Milk | 27.3 | 21.6 | Legumes | 27.0 | 17.8 |  |
|                                | Male s (%)                                                                                                                                                                                                                                                                                                                                                                                                                                      | Fema les (%)                                                                                                                                                                                                                 |                                                                            |              |                    |      |      |            |      |      |        |      |      |                  |      |      |               |      |     |                                                                                                                                                                                                                                                                                                                                                            |  |           |              |              |      |      |      |      |      |      |      |      |         |      |      |  |
| Bread/rice/noodles             | 72.5                                                                                                                                                                                                                                                                                                                                                                                                                                            | 70.9                                                                                                                                                                                                                         |                                                                            |              |                    |      |      |            |      |      |        |      |      |                  |      |      |               |      |     |                                                                                                                                                                                                                                                                                                                                                            |  |           |              |              |      |      |      |      |      |      |      |      |         |      |      |  |
| Vegetables                     | 61.7                                                                                                                                                                                                                                                                                                                                                                                                                                            | 60.8                                                                                                                                                                                                                         |                                                                            |              |                    |      |      |            |      |      |        |      |      |                  |      |      |               |      |     |                                                                                                                                                                                                                                                                                                                                                            |  |           |              |              |      |      |      |      |      |      |      |      |         |      |      |  |
| Fruits                         | 24.9                                                                                                                                                                                                                                                                                                                                                                                                                                            | 23.1                                                                                                                                                                                                                         |                                                                            |              |                    |      |      |            |      |      |        |      |      |                  |      |      |               |      |     |                                                                                                                                                                                                                                                                                                                                                            |  |           |              |              |      |      |      |      |      |      |      |      |         |      |      |  |
| 100% fruit juice               | 22.0                                                                                                                                                                                                                                                                                                                                                                                                                                            | 14.4                                                                                                                                                                                                                         |                                                                            |              |                    |      |      |            |      |      |        |      |      |                  |      |      |               |      |     |                                                                                                                                                                                                                                                                                                                                                            |  |           |              |              |      |      |      |      |      |      |      |      |         |      |      |  |
| Canned drinks                  | 21.1                                                                                                                                                                                                                                                                                                                                                                                                                                            | 7.8                                                                                                                                                                                                                          |                                                                            |              |                    |      |      |            |      |      |        |      |      |                  |      |      |               |      |     |                                                                                                                                                                                                                                                                                                                                                            |  |           |              |              |      |      |      |      |      |      |      |      |         |      |      |  |
|                                | Males (%)                                                                                                                                                                                                                                                                                                                                                                                                                                       | Fema les (%)                                                                                                                                                                                                                 |                                                                            |              |                    |      |      |            |      |      |        |      |      |                  |      |      |               |      |     |                                                                                                                                                                                                                                                                                                                                                            |  |           |              |              |      |      |      |      |      |      |      |      |         |      |      |  |
| Meat/chicken                   | 70.9                                                                                                                                                                                                                                                                                                                                                                                                                                            | 59.4                                                                                                                                                                                                                         |                                                                            |              |                    |      |      |            |      |      |        |      |      |                  |      |      |               |      |     |                                                                                                                                                                                                                                                                                                                                                            |  |           |              |              |      |      |      |      |      |      |      |      |         |      |      |  |
| Fish                           | 40.1                                                                                                                                                                                                                                                                                                                                                                                                                                            | 33.8                                                                                                                                                                                                                         |                                                                            |              |                    |      |      |            |      |      |        |      |      |                  |      |      |               |      |     |                                                                                                                                                                                                                                                                                                                                                            |  |           |              |              |      |      |      |      |      |      |      |      |         |      |      |  |
| Milk                           | 27.3                                                                                                                                                                                                                                                                                                                                                                                                                                            | 21.6                                                                                                                                                                                                                         |                                                                            |              |                    |      |      |            |      |      |        |      |      |                  |      |      |               |      |     |                                                                                                                                                                                                                                                                                                                                                            |  |           |              |              |      |      |      |      |      |      |      |      |         |      |      |  |
| Legumes                        | 27.0                                                                                                                                                                                                                                                                                                                                                                                                                                            | 17.8                                                                                                                                                                                                                         |                                                                            |              |                    |      |      |            |      |      |        |      |      |                  |      |      |               |      |     |                                                                                                                                                                                                                                                                                                                                                            |  |           |              |              |      |      |      |      |      |      |      |      |         |      |      |  |

Older adults

|                        |                                                                                           |            |                                              |                                                 |                   |
|------------------------|-------------------------------------------------------------------------------------------|------------|----------------------------------------------|-------------------------------------------------|-------------------|
| Eng & Moy (2011)[21]   | NR                                                                                        |            | NR                                           | Type of fat consumed daily, g/day (% of energy) |                   |
|                        |                                                                                           |            |                                              | - Saturated fat = 22.7 g/day (10.1% energy)     |                   |
|                        |                                                                                           |            |                                              | - MUFA = 19.1 g/day (8.52% energy)              |                   |
|                        |                                                                                           |            |                                              | - PUFA = 12 g/day (5.34% energy)                |                   |
| Asma et al. (2010)[23] | % of recommended no. of servings of carbohydrate-source food groups                       |            | NR                                           | % energy from saturated fat                     |                   |
|                        |                                                                                           | Husbands   | wives                                        |                                                 |                   |
|                        |                                                                                           | Grains     | 110.4%                                       | 97.3%                                           | - Husbands = 4.3% |
|                        |                                                                                           | Vegetables | 69.7                                         | 68.3                                            | - Wives = 4.9%    |
|                        |                                                                                           | Fruits     | 59.6                                         | 49.7                                            |                   |
| Pon et al. (2006)[15]  | CHO foods consumed daily: fruits (71% of subjects); vegetables (90% of subjects)          |            | Protein foods consumed daily (% of subjects) | NR                                              |                   |
|                        | Carbohydrate-containing dishes consumed in at least 1 meal during the day (% of subjects) |            |                                              |                                                 |                   |
|                        | - Rice (in mixed rice, chicken rice, nasi lemak) (100%)                                   |            | - Fish & seafood (36.0%)                     |                                                 |                   |
|                        | - Bread, cookies, cereals (55%)                                                           |            | - Milk (34.7%)                               |                                                 |                   |
|                        | - Noodles soup/similar (30%)                                                              |            | - Legumes & products (15.3%)                 |                                                 |                   |
|                        | - Fried noodles/similar (25%)                                                             |            | - Poultry (13.1%)                            |                                                 |                   |
|                        | - Fruits, vegetables (12%)                                                                |            | - Cheese & yogurt (5.3%)                     |                                                 |                   |
|                        |                                                                                           |            | - Meat (4.7%)                                |                                                 |                   |

- Roti canai, thosai,  
sandwiches, sweet potatoes  
(11%)

- Cakes/local pastries (4%)
- 

NR – not reported

\* Calculated from Food Balance Sheet data
